# Supplementary material for: Comparing fish prey diversity for a critically endangered aquatic mammal in a reserve and the wild using eDNA metabarcoding
Source: PubMed Central journal article supplement (PMC7542144; doi:10.1038/s41598-020-73648-2), 2020-10-07
Supplement: 41598_2020_73648_MOESM1_ESM.pdf [file 41598_2020_73648_MOESM1_ESM.pdf]

## Supplementary information

Comparing fish prey diversity for a critically endangered aquatic mammal in a reserve and the wild using eDNA metabarcoding.

Chanjuan Qu<sup>1,2</sup>, Kathryn A. Stewart<sup>1,3</sup>, Rute Clemente-Carvalho<sup>2</sup>, Jinsong Zheng<sup>4</sup>, Yuxiang Wang<sup>2</sup>,  
Cheng Gong<sup>5</sup>, Limin Ma<sup>1</sup>, Jianfu Zhao<sup>1</sup> & Stephen C. Lougheed<sup>2</sup>

1. State Key Laboratory for Pollution Control and Resource Reuse, College of Environmental Science and Engineering, Tongji University, Shanghai, China
2. Department of Biology, Queen's University, Kingston, Ontario, Canada
3. Institute for Biodiversity and Ecosystem Dynamics, University of Amsterdam, Amsterdam, Netherlands
4. Key Laboratory of Aquatic Biodiversity and Conservation of Chinese Academy of Sciences, Institute of Hydrobiology of Chinese Academy of Sciences, Wuhan, Hubei, China
5. Administrative Office of Hubei Yangtze Tian'eZhou Baiji National Natural Reserve, Shishou, Hubei, China

## Supplementary tables

**Table S1:** The geographical location and water quality parameters among 15 sampling sites (Fig. 1) between two seasons (spring and summer) and sampling regions (Tian-e-Zhou Reserve and Poyang Lake).

| Region              | Site | Location              | Sampling depth (m) |        | Temperature (°C) |        | pH     |        | Dissolved Oxygen (mg/L) |        |
|---------------------|------|-----------------------|--------------------|--------|------------------|--------|--------|--------|-------------------------|--------|
|                     |      |                       | spring             | summer | spring           | summer | spring | summer | spring                  | summer |
| Tian-e-Zhou Reserve | A    | 29°51'06N, 112°33'56E | 12.99              | 12.99  | 13.2             | 23.3   | 7.684  | 7.160  | 10.39                   | 2.57   |
|                     | B    | 29°50'39N, 112°33'06E | 12.99              | 12.99  | 13.0             | 23.4   | 7.634  | 7.161  | 10.35                   | 1.63   |
|                     | C    | 29°49'47N, 112°32'49E | 7.50               | 7.50   | 15.2             | 27.7   | 8.123  | 6.977  | 13.46                   | 7.76   |
|                     | D    | 29°49'36N, 112°36'44E | 12.99              | 12.99  | 14.8             | 23.9   | 7.604  | 7.103  | 9.83                    | 1.04   |
|                     | E    | 29°48'36N, 112°36'36E | 3.85               | 3.85   | 16.3             | 28.2   | 7.956  | 6.995  | 10.72                   | 7.99   |
| Poyang Lake         | a    | 29°14'40N, 116°07'07E | 2.40               | 2.40   | 21.2             | 34.6   | 7.060  | 7.245  | 10.19                   | 5.69   |
|                     | b    | 29°13'45N, 116°07'15E | 9.30               | 8.40   | 20.1             | 32.2   | 7.059  | 7.182  | 9.59                    | 6.41   |
|                     | c    | 29°13'04N, 116°10'42E | 9.30               | 9.30   | 20.5             | 32.4   | 7.049  | 7.055  | 9.59                    | 6.32   |
|                     | d    | 29°14'01N, 116°11'08E | 2.85               | 2.85   | 20.3             | 34.0   | 7.035  | 7.219  | 8.59                    | 6.21   |
|                     | e    | 29°14'42N, 116°11'19E | 6.55               | 5.30   | 19.3             | 32.9   | 7.443  | 7.226  | 11.40                   | 5.76   |
|                     | f    | 29°14'41N, 116°13'05E | 8.40               | 5.65   | 21.9             | 32.7   | 7.048  | 7.115  | 9.34                    | 6.32   |
|                     | g    | 29°12'54N, 116°13'11E | 2.85               | 2.85   | 21.4             | 34.0   | 7.062  | 7.023  | 9.53                    | 5.76   |
|                     | h    | 29°14'21N, 116°14'20E | 6.55               | 5.65   | 21.0             | 32.5   | 7.074  | 7.053  | 10.56                   | 6.15   |
|                     | i    | 29°12'53N, 116°16'12E | 6.55               | 6.55   | 22.0             | 31.9   | 7.015  | 7.075  | 9.49                    | 6.41   |
|                     | j    | 29°12'30N, 116°16'53E | 2.85               | 2.85   | 21.2             | 32.3   | 7.081  | 7.056  | 11.65                   | 6.24   |

**Table S2:** A list of fish species used for designing universal primers including 28 species belonging to 4 orders, 8 families and 22 genera from the literature<sup>1-7</sup>.

| Class                 | Order                | Family             | Species                                  | Reference                                      | Accession Number                      |                                   |                                                                                                                                   |
|-----------------------|----------------------|--------------------|------------------------------------------|------------------------------------------------|---------------------------------------|-----------------------------------|-----------------------------------------------------------------------------------------------------------------------------------|
| <i>Actinopterygii</i> | <i>Clupeiformes</i>  | <i>Engraulidae</i> | <i>Coilia brachygnathus</i> <sup>e</sup> | 1                                              | KP185129<br>NC_026912                 |                                   |                                                                                                                                   |
|                       |                      |                    | <i>Coilia nasus</i>                      | 2                                              | JX625133<br>NC_019625                 |                                   |                                                                                                                                   |
|                       | <i>Cypriniformes</i> | <i>Cobitidae</i>   | <i>Leptobotia</i>                        | <i>taeniops</i>                                | 1                                     | KM386686<br>NC_026130<br>AP013304 |                                                                                                                                   |
|                       |                      |                    |                                          | <i>Parabotia fasciata</i>                      | 1                                     | KM393223<br>NC_026128<br>AP011437 |                                                                                                                                   |
|                       |                      |                    |                                          | <i>Acheilognathus macropterus</i> <sup>e</sup> | 1                                     | EF483935<br>NC_013711<br>KJ499466 |                                                                                                                                   |
|                       |                      | <i>Cyprinidae</i>  |                                          |                                                | <i>Carassius auratus</i> <sup>e</sup> | 3                                 | KF147851<br>EF483931<br>KM659025<br>KX505165<br>KJ476998<br>KJ874428<br>KJ874429<br>KJ874430<br>KU146528<br>NC_002079<br>KJ874431 |
|                       |                      |                    |                                          |                                                | <i>Chanodichthys dabryi</i>           | 1                                 | KC526217<br>NC_021418<br>AP012111                                                                                                 |
|                       |                      |                    |                                          |                                                | <i>Chanodichthys mongolicus</i>       | 1                                 | AP009060<br>NC_008683<br>KF826087<br>KC701385                                                                                     |
|                       |                      |                    |                                          |                                                | <i>Ctenopharyngodon idella</i>        | 4                                 | HQ891005<br>JQ231115<br>EU391390                                                                                                  |

|                                         |   |           |
|-----------------------------------------|---|-----------|
|                                         |   | NC_010288 |
|                                         |   | KT894100  |
| <i>Cyprinus carpio</i>                  | 3 | KJ511883  |
|                                         |   | KP993137  |
|                                         |   | KU050703  |
|                                         |   | KU301745  |
|                                         |   | KF856965  |
|                                         |   | KP993136  |
|                                         |   | KU159761  |
|                                         |   | AP009047  |
|                                         |   | X61010    |
|                                         |   | NC_001606 |
| <i>Gobiobotia filifer</i>               | 1 | KP325413  |
|                                         |   | NC_029187 |
| <i>Hemiculter bleekeri</i> <sup>c</sup> | 1 | KU198332  |
|                                         |   | NC_029831 |
| <i>Hemiculter leucisculus</i>           | 5 | KF956522  |
|                                         |   | AP012110  |
|                                         |   | KF647872  |
|                                         |   | NC_022929 |
| <i>Hypophthalmichthys molitrix</i>      | 4 | EU315941  |
|                                         |   | NC_010156 |
|                                         |   | JQ231114  |
|                                         |   | MF180232  |
|                                         |   | KJ671450  |
|                                         |   | KJ679503  |
|                                         |   | KJ729076  |
|                                         |   | KJ729093  |
|                                         |   | KJ729094  |
|                                         |   | KJ746939  |
|                                         |   | KJ746945  |
|                                         |   | KJ746946  |
|                                         |   | KJ746947  |
|                                         |   | KJ746948  |
|                                         |   | KJ746952  |
|                                         |   | KJ746953  |
|                                         |   | KJ746954  |
|                                         |   | KJ746956  |
|                                         |   | KJ671449  |

|                           |   |           |
|---------------------------|---|-----------|
|                           |   | KJ729092  |
|                           |   | KJ746938  |
|                           |   | KJ746940  |
|                           |   | KJ746943  |
|                           |   | KJ746944  |
|                           |   | KJ746949  |
|                           |   | KJ746950  |
|                           |   | KJ746951  |
|                           |   | KJ746955  |
|                           |   | KJ746957  |
|                           |   | KJ746960  |
|                           |   | KJ746961  |
|                           |   | MF180230  |
|                           |   | KP013119  |
| <i>Hypophthalmichthys</i> | 4 | EU343733  |
| <i>nobilis</i>            |   | NC_010194 |
|                           |   | KJ679504  |
|                           |   | KJ679505  |
|                           |   | KJ710363  |
|                           |   | KJ729077  |
|                           |   | KJ729080  |
|                           |   | KJ729081  |
|                           |   | KJ729082  |
|                           |   | KJ729084  |
|                           |   | KJ729088  |
|                           |   | KJ729089  |
|                           |   | KJ729091  |
|                           |   | KJ729096  |
|                           |   | KJ746935  |
|                           |   | KJ746936  |
|                           |   | KJ746937  |
|                           |   | KJ746942  |
|                           |   | KJ746959  |
|                           |   | KJ746962  |
|                           |   | KJ746963  |
|                           |   | KJ756343  |
|                           |   | HM162839  |
|                           |   | KJ710362  |
|                           |   | KJ729078  |

|                        |   |          |
|------------------------|---|----------|
|                        |   | KJ729079 |
|                        |   | KJ729083 |
|                        |   | KJ729085 |
|                        |   | KJ729086 |
|                        |   | KJ729087 |
|                        |   | KJ729090 |
|                        |   | KJ729095 |
|                        |   | KJ729097 |
|                        |   | KJ746958 |
|                        |   | KJ746966 |
|                        |   | KJ746941 |
|                        |   | AP011217 |
| <i>Mylopharyngodon</i> |   |          |
| <i>piceus</i>          | 5 | MF687109 |
|                        |   | MF687110 |
|                        |   | MF687111 |
|                        |   | MF687112 |
|                        |   | MF687113 |
|                        |   | MF687114 |
|                        |   | MF687115 |
|                        |   | MF687116 |
|                        |   | MF687117 |
|                        |   | MF687118 |
|                        |   | MF687119 |
|                        |   | MF687120 |
|                        |   | MF687121 |
|                        |   | MF687122 |
|                        |   | MF687123 |
|                        |   | MF687124 |
|                        |   | MF687125 |
|                        |   | MF687126 |
|                        |   | MF687127 |
|                        |   | MF687128 |
|                        |   | MF687129 |
|                        |   | MF687130 |
|                        |   | MF687131 |
|                        |   | MF687132 |
|                        |   | MF687133 |
|                        |   | MF687134 |
|                        |   | MF687135 |

|                     |                  |                                           |   |           |
|---------------------|------------------|-------------------------------------------|---|-----------|
|                     |                  |                                           |   | MF687136  |
|                     |                  |                                           |   | MF687137  |
|                     |                  |                                           |   | DQ026435  |
|                     |                  |                                           |   | AP011216  |
|                     |                  |                                           |   | EU979306  |
|                     |                  |                                           |   | EU979305  |
|                     |                  |                                           |   | EU979307  |
|                     |                  |                                           |   | NC_011141 |
|                     |                  | <i>Parabramis pekinensis</i> <sup>e</sup> | 4 | KF857485  |
|                     |                  |                                           |   | JX242531  |
|                     |                  |                                           |   | NC_022678 |
|                     |                  | <i>Pseudobrama simoni</i>                 | 1 | KF537571  |
|                     |                  |                                           |   | NC_022852 |
|                     |                  |                                           |   | AP011364  |
|                     |                  | <i>Pseudolaubuca engraulis</i>            | 1 | KC429670  |
|                     |                  |                                           |   | NC_020462 |
|                     |                  | <i>Squalidus argentatus</i> <sup>e</sup>  | 1 | KF819452  |
|                     |                  |                                           |   | KF801059  |
|                     |                  |                                           |   | NC_023336 |
|                     |                  |                                           |   | KF926824  |
|                     |                  | <i>Xenocypris davidi</i>                  | 6 | GQ289558  |
|                     |                  |                                           |   | NC_013072 |
|                     |                  |                                           |   | KF039718  |
| <i>Perciformes</i>  | <i>Channidae</i> | <i>Channa argus</i>                       | 7 | GU937112  |
|                     |                  |                                           |   | NC_015191 |
|                     |                  |                                           |   | JX978723  |
|                     |                  |                                           |   | KC823605  |
|                     |                  |                                           |   | AP006041  |
|                     | <i>Cichlidae</i> | <i>Oreochromis mossambicus</i>            | 2 | AY597335  |
|                     |                  |                                           |   | NC_007231 |
|                     | <i>Gobiidae</i>  | <i>Rhinogobius giurinus</i> <sup>e</sup>  | 1 | KF371534  |
|                     |                  |                                           |   | NC_022692 |
|                     |                  |                                           |   | KP892753  |
|                     |                  |                                           |   | KU871066  |
| <i>Siluriformes</i> | <i>Bagridae</i>  | <i>Tachysurus argentivittatus</i>         | 1 | KX164404  |
|                     |                  |                                           |   | NC_030538 |
|                     |                  | <i>Tachysurus fulvidraco</i> <sup>e</sup> | 6 | HM641815  |
|                     |                  |                                           |   | NC_015888 |

|                  |                                    |   |           |
|------------------|------------------------------------|---|-----------|
|                  |                                    |   | KC287172  |
|                  | <i>Tachysurus nitidus</i>          | 1 | KC822643  |
|                  |                                    |   | HM746659  |
|                  |                                    |   | NC_014859 |
| <i>Siluridae</i> | <i>Silurus asotus</i> <sup>e</sup> | 7 | JN116720  |
|                  |                                    |   | JX087351  |
|                  |                                    |   | JX256247  |
|                  |                                    |   | AP012022  |
|                  |                                    |   | NC_015806 |

---

Note: (1) <sup>e</sup>9 fish species that we have their tissue samples. (2) The Latin name of fish species and the higher level of classification are based on <https://www.fishbase.se/>.



**Table S3:** Target sequences of 19 species of fishes for making synthetic DNA solutions.

| Species                                                                                         | Sequences                                                                                                                                                             |
|-------------------------------------------------------------------------------------------------|-----------------------------------------------------------------------------------------------------------------------------------------------------------------------|
| <i>Channa argus</i>                                                                             | ATTAACCCTCGTACCTTTTGCATCATGATTTAGCCAGTAAGCCCAAGCAAAGAGACTTTAGTTTGACCCCCGAAACTAAGTGA<br>GCTACTCCAAGACAGCCTATTTTAGGGCCAACCCGTCTCTGTGGCAAAAGAGTGGGAAGAGCTTTGAGTA         |
| <i>Chanodichthys dabryi</i> ,<br><i>Chanodichthys mongolicus</i> ,<br><i>Pseudobrama simoni</i> | ACTAAACCTTGTACCTTTTGCATCATGATTTAGCCAGCACCCCTCAAGCAAAGAGACCTTTAGTTTGAAACCCCGAAACCAGGTGA<br>GCTACCCCGAGACAGCCTATTTAAATTTAGGGCTAACCCGTCTCTGTGGCAAAAGAGTGGGAAGAGCTCCGGGTA |
| <i>Coilia nasus</i>                                                                             | ACACCCCTCGTACCTTTTGCATCATGATTCAGCTAGTAAAATACATGCAAAGAGACCTCTAGTTTGTAACCCCGAAACCCGACGA<br>GCTACTCCGGGACAGCCTATCAAGGGCCAACCCGTCTCTGTGGCAAAAGAGTGGGAAGATCCCCGAGTA        |
| <i>Ctenopharyngodon idella</i>                                                                  | TAAACCTTGTACCTTTTGCATCATGATTTAGCCAGCACCCCTCAAGCAAAGAGACCTTTAGTTTGAAACCCCGAAACCAGGTGAGC<br>TACCCCGAGACAGCCTATTTAAATTTAGGGCTAACCCGTCTCTGTGGCAAAAGAGTGGGAAGAGCTCCGGGTA   |
| <i>Cyprinus carpio</i>                                                                          | ATTAACCTCGTACCTTTTGCATCATGATTTAGCCAGTACACCCCAAGCAAAGAGACCTTTAGTTTGAAACCCCGAAACCAGGTGA<br>GCTACCCCGAGACAGCCTATTAAGGGCCAACCCGTCTCTGTGGCAAAAGAGTGGGAAGAGCTCCGGGTA        |
| <i>Gobiobotia filifer</i>                                                                       | ATTAACCTTGTACCTTTTGCATCATGATTTAGCCAGTACCTCCAAGCAAAGAGACCTTTAGTTTGAAACCCCGAAACCAGGTGA<br>GCTACCCCGAGACAGCCTATATAACTTAGGGCTAACCCGTCTCTGTGGCAAAAGAGTGGGAAGAGCTCCGGGGT    |
| <i>Hemiculter leucisculus</i>                                                                   | ACTAAACCTTGTACCTTTTGCATCATGATTTAGCCAGCACCCCTCAAGCAGAGAGACCTTTAGTTTGAAACCCCGAAACCAGGTGA<br>GCTACCCCGAGACAGCCTATTTAAATTTAGGGCTAACCCGTCTCTGTGGCAAAAGAGTGGGAAGAGCTCCGGGTA |
| <i>Hypophthalmichthys molitrix</i> ,<br><i>Hypophthalmichthys nobilis</i>                       | ACTAAACCTTGTACCTTTTGCATCATGATTTAGCCAGCACCCCTCAAGCAAAGAGACCTTTAGTTTGAAACCCCGAAACCAGGTGA<br>GCTACCCCGAGACAGCCTATTTAAATTTAGGGCTAACCCGTCTCTGTGGCAAAAGAGTGGGAAGAGCTCCGGGTA |
| <i>Leptobotia taeniops</i>                                                                      | ACTAAAACCTCGTACCTTTTGCATCATGATTTAGCCAGCACCCCTCAAGCAAAGAGACCTTTAGTTTGAAACCCCGAAACCAAGTGA<br>GCTACCCCGAGACAGCCTATATGGGCCAACCCGTCTCTGTGGCAAAAGAGTGGGAAGAGCTCTGGGTA       |
| <i>Mylopharyngodon piceus</i>                                                                   | ATTAACCTTGTACCTTTTGCATCATGATTTAGCAAGCACCCCTCAAGCAAAGAGACCTTTAGTTTGAAACCCCGAAACCAGGTGA<br>GCTACCCCGAGACAGCCTATTTAAATTTAGGGCTAACCCGTCTCTGTGGCAAAAGAGTGGGAAGAGCTCTGGGTA  |
| <i>Oreochromis mossambicus</i>                                                                  | ACCGCCCTCGTACCTTTTGCATCATGATTTAGCCAGAAATCTCTTAAGCAAAAAGCATTATAGTTTAATACCCCGAAACTAAGC<br>GAGTACTCCAAGACAGTCTAATTTATAGGACCGCCCGTCTCTGTGGCAAAAGAGTGGGAAGAAGCTTTGAGTA     |
| <i>Parabotia fasciata</i>                                                                       | ATTAAAAACCTCGTACCTTTTGCATCATGATTTAGCCAGCACCCCTCAAGCAAAGAGACCTTTAGTTTGAAACCCCGAAACCAAGTGA<br>GCTACCCCGAGACAGCCTTCATGGGCCAACCCGTCTCTGTGGCAAAAGAGTGGGAAGAGCTCTGGGTA      |

|                                   |                                                                                                                                                                       |
|-----------------------------------|-----------------------------------------------------------------------------------------------------------------------------------------------------------------------|
| <i>Pseudolaubuca engraulis</i>    | ACTAAACCTTGTACCTTTTGCATCATGATTTAGCCAGCACCCCTCAAGCAAAGAGACCTTTAGTTTGAAACCCCGAAACCAGGTGA<br>GCTACCCCGAGACAGCCTATTTAAATTTAGGGCTAACCCGTCTCTGTGGCAAAGAGTGGGGAGAGCTCCGGGTA  |
| <i>Tachysurus argentivittatus</i> | ATTAAACCTCGTACCTTTTGCATCATGATTTAGCTAGACCTTCTGAGCAAAGAGTACTTTAGTTCAAAACCCCGAAACTACGTGA<br>GCTACCCCGAAACAGCCTATCAATTAGGGCCAGCCCGTCTCTGTGGCAAAGAGTGGGAAGATTACCGGGTA      |
| <i>Tachysurus nitidus</i>         | ATTAAACCTCGTACCTTTTGCATCATGATTTAGCTAGACCTTCTGAGCAAAGAGTACTTTAGTTCAAAACCCCGAAACTACGTGA<br>GCTACCCCGAAACAGCCTATAAATTAGGGCCAACCCGTCTCTGTGGCAAAGAGTGGGAAGATTCCGGGTA       |
| <i>Xenocypris davidi</i>          | ACTAAACCTTGTACCTTTTGCATCATGATTTAGCCAGCACCCCTCAAGCAAAGGAGACCTTTAGTTTGAAACCCCGAAACCAGGTGA<br>GCTACCCCGAGACAGCCTATTTAAATTTAGGGCTAACCCGTCTCTGTGGCAAAGAGTGGGAAGAGCTCCGGGTA |

---

**Table S4:** Primer sequences for library preparation.**The first-round PCR primers**

Forward: ACACTCTTCCCTACACGA + CGCTCTTCCGATCT + 16S\_eDNAF sequences

Reverse: GTGACTGGAGTTCAGACGTG + TGCTCTTCCGATCT + 16S\_eDNAR sequences

**The second-round PCR primers**

Forward: AATGATACGGCGACCACCGAGATCTACAC + i5 bases + ACACTCTTCCCTACACGA

Reverse: CAAGCAGAAGACGGCATAACGAGAT + i7 bases + GTGACTGGAGTTCAGACGTG

| Sample number | i7 index name | i7 bases | i5 index name | i5 bases |
|---------------|---------------|----------|---------------|----------|
| A41           | D701          | CGAGTAAT | D501          | TATAGCCT |
| A42           | D702          | TCTCCGGA | D501          | TATAGCCT |
| A43           | D703          | AATGAGCG | D501          | TATAGCCT |
| B41           | D704          | GGAATCTC | D501          | TATAGCCT |
| B42           | D705          | TTCTGAAT | D501          | TATAGCCT |
| B43           | D706          | ACGAATTC | D501          | TATAGCCT |
| C41           | D707          | AGCTTCAG | D501          | TATAGCCT |
| C42           | D708          | GCGCATTA | D501          | TATAGCCT |
| C43           | D709          | CATAGCCG | D501          | TATAGCCT |
| D41           | D710          | TTCGCGGA | D501          | TATAGCCT |
| D42           | D711          | GCGCGAGA | D501          | TATAGCCT |
| D43           | D712          | CTATCGCT | D501          | TATAGCCT |
| E41           | D701          | CGAGTAAT | D502          | ATAGAGGC |
| E42           | D702          | TCTCCGGA | D502          | ATAGAGGC |
| E43           | D703          | AATGAGCG | D502          | ATAGAGGC |
| d41           | D704          | GGAATCTC | D502          | ATAGAGGC |
| d42           | D705          | TTCTGAAT | D502          | ATAGAGGC |
| d43           | D706          | ACGAATTC | D502          | ATAGAGGC |
| e41           | D707          | AGCTTCAG | D502          | ATAGAGGC |
| e42           | D708          | GCGCATTA | D502          | ATAGAGGC |
| e43           | D709          | CATAGCCG | D502          | ATAGAGGC |
| c41           | D710          | TTCGCGGA | D502          | ATAGAGGC |
| c42           | D711          | GCGCGAGA | D502          | ATAGAGGC |
| c43           | D712          | CTATCGCT | D502          | ATAGAGGC |
| b41           | D701          | CGAGTAAT | D503          | CCTATCCT |
| b42           | D702          | TCTCCGGA | D503          | CCTATCCT |
| b43           | D703          | AATGAGCG | D503          | CCTATCCT |
| a41           | D704          | GGAATCTC | D503          | CCTATCCT |
| a42           | D705          | TTCTGAAT | D503          | CCTATCCT |
| a43           | D706          | ACGAATTC | D503          | CCTATCCT |
| h41           | D707          | AGCTTCAG | D503          | CCTATCCT |

|     |      |           |      |          |
|-----|------|-----------|------|----------|
| h42 | D708 | GCGCATT A | D503 | CCTATCCT |
| h43 | D709 | CATAGCCG  | D503 | CCTATCCT |
| g41 | D710 | TTCGCGGA  | D503 | CCTATCCT |
| g42 | D711 | GCGCGAGA  | D503 | CCTATCCT |
| g43 | D712 | CTATCGCT  | D503 | CCTATCCT |
| j41 | D701 | CGAGTAAT  | D504 | GGCTCTGA |
| j42 | D702 | TCTCCGGA  | D504 | GGCTCTGA |
| j43 | D703 | AATGAGCG  | D504 | GGCTCTGA |
| i41 | D704 | GGAATCTC  | D504 | GGCTCTGA |
| i42 | D705 | TTCTGAAT  | D504 | GGCTCTGA |
| i43 | D706 | ACGAATTC  | D504 | GGCTCTGA |
| f41 | D707 | AGCTTCAG  | D504 | GGCTCTGA |
| f42 | D708 | GCGCATT A | D504 | GGCTCTGA |
| f43 | D709 | CATAGCCG  | D504 | GGCTCTGA |
| A71 | D710 | TTCGCGGA  | D504 | GGCTCTGA |
| A72 | D711 | GCGCGAGA  | D504 | GGCTCTGA |
| A73 | D712 | CTATCGCT  | D504 | GGCTCTGA |
| B71 | D701 | CGAGTAAT  | D505 | AGGCGAAG |
| B72 | D702 | TCTCCGGA  | D505 | AGGCGAAG |
| B73 | D703 | AATGAGCG  | D505 | AGGCGAAG |
| C71 | D704 | GGAATCTC  | D505 | AGGCGAAG |
| C72 | D705 | TTCTGAAT  | D505 | AGGCGAAG |
| C73 | D706 | ACGAATTC  | D505 | AGGCGAAG |
| D71 | D707 | AGCTTCAG  | D505 | AGGCGAAG |
| D72 | D708 | GCGCATT A | D505 | AGGCGAAG |
| D73 | D709 | CATAGCCG  | D505 | AGGCGAAG |
| E71 | D710 | TTCGCGGA  | D505 | AGGCGAAG |
| E72 | D711 | GCGCGAGA  | D505 | AGGCGAAG |
| E73 | D712 | CTATCGCT  | D505 | AGGCGAAG |
| d71 | D701 | CGAGTAAT  | D506 | TAATCTTA |
| d72 | D702 | TCTCCGGA  | D506 | TAATCTTA |
| d73 | D703 | AATGAGCG  | D506 | TAATCTTA |
| e71 | D704 | GGAATCTC  | D506 | TAATCTTA |
| e72 | D705 | TTCTGAAT  | D506 | TAATCTTA |
| e73 | D706 | ACGAATTC  | D506 | TAATCTTA |
| c71 | D707 | AGCTTCAG  | D506 | TAATCTTA |
| c72 | D708 | GCGCATT A | D506 | TAATCTTA |
| c73 | D709 | CATAGCCG  | D506 | TAATCTTA |
| b71 | D710 | TTCGCGGA  | D506 | TAATCTTA |
| b72 | D711 | GCGCGAGA  | D506 | TAATCTTA |
| b73 | D712 | CTATCGCT  | D506 | TAATCTTA |
| a71 | D701 | CGAGTAAT  | D507 | CAGGACGT |
| a72 | D702 | TCTCCGGA  | D507 | CAGGACGT |

|     |      |          |      |          |
|-----|------|----------|------|----------|
| a73 | D703 | AATGAGCG | D507 | CAGGACGT |
| h71 | D704 | GGAATCTC | D507 | CAGGACGT |
| h72 | D705 | TTCTGAAT | D507 | CAGGACGT |
| h73 | D706 | ACGAATTC | D507 | CAGGACGT |
| g71 | D707 | AGCTTCAG | D507 | CAGGACGT |
| g72 | D708 | GCGCATT  | D507 | CAGGACGT |
| g73 | D709 | CATAGCCG | D507 | CAGGACGT |
| j71 | D710 | TTCGCGGA | D507 | CAGGACGT |
| j72 | D711 | GCGCGAGA | D507 | CAGGACGT |
| j73 | D712 | CTATCGCT | D507 | CAGGACGT |
| i71 | D701 | CGAGTAAT | D508 | GTACTGAC |
| i72 | D702 | TCTCCGGA | D508 | GTACTGAC |
| i73 | D703 | AATGAGCG | D508 | GTACTGAC |
| f71 | D704 | GGAATCTC | D508 | GTACTGAC |
| f72 | D705 | TTCTGAAT | D508 | GTACTGAC |
| f73 | D706 | ACGAATTC | D508 | GTACTGAC |

Note: (1) Site A, B, C, D and E are from Tian-e-Zhou Baiji National Nature Reserve; site a, b, c, d, e, f, g, h, i and j are from Poyang Lake. (2) Sample number A41, A42 and A43 represent 3 PCR replicates of the eDNA sample collected at sampling site A in spring, respectively; sample number A71, A72 and A73 represent 3 PCR replicates of the eDNA sample collected at sampling site A in summer, respectively; other sample numbers have similar meanings.





Table S6: Taxonomic composition and read numbers of the 75 fish species from 90 libraries identified in HiSeq analyses of eDNA samples

| Species number | Class          | Order         | Family        | Species                                                          | A41   | A42 | A43   | B41     | B42   | B43    | C41    | C42    | C43    | D41    | D42    | D43   | E41 | E42    | E43    | a41   | a42    | a43    | b41    | b42    | b43    | c41    | c42    | c43    | d41 |
|----------------|----------------|---------------|---------------|------------------------------------------------------------------|-------|-----|-------|---------|-------|--------|--------|--------|--------|--------|--------|-------|-----|--------|--------|-------|--------|--------|--------|--------|--------|--------|--------|--------|-----|
| 1              | Actinopterygii | Beloniformes  | Hemiramphidae | <i>Hyporhamphus intermedius</i>                                  |       |     |       |         |       |        |        |        |        |        |        |       |     |        |        | 15    | 24     |        |        |        |        |        |        |        |     |
| 2              | Actinopterygii | Clupeiformes  | Engraulidae   | <i>Coilia lindmani</i>                                           |       |     |       |         |       |        |        |        |        |        |        |       |     |        |        | 130   | 127    | 1,026  | 149    | 80     | 199    | 171    | 114    | 106    | 101 |
| 3              | Actinopterygii | Clupeiformes  | Engraulidae   | <i>Coilia mystus</i>                                             |       |     |       |         |       |        |        |        |        |        |        |       |     |        |        | 13    | 17     | 26     | 22     | 35     | 43     | 12     | 17     | 10     |     |
| 4              | Actinopterygii | Cypriniformes | Cobitidae     | <i>Cobitis elongatoides</i>                                      |       |     |       |         |       |        |        |        |        |        |        |       |     |        |        | 16    | 22     |        |        |        |        |        |        |        |     |
| 5              | Actinopterygii | Cypriniformes | Cobitidae     | <i>Cobitis lutheri</i>                                           |       |     |       |         |       |        |        |        |        |        |        |       |     |        |        |       |        |        |        |        |        |        |        |        |     |
| 6              | Actinopterygii | Cypriniformes | Cyprinidae    | <i>Acanthorhodeus chankaensis</i>                                | 72    | 89  | 79    | 66      | 76    | 58     | 76     | 66,327 | 65     | 174    | 32,569 | 48    | 23  | 46     | 17     | 3,306 | 1,123  | 4,209  | 15     | 23     | 14     | 23,955 | 52     |        | 43  |
| 7              | Actinopterygii | Cypriniformes | Cyprinidae    | <i>Acheilognathus imberbis</i>                                   |       |     | 10    | 10      |       |        |        |        |        |        |        |       |     |        |        | 13    | 14     |        |        | 13     | 16     |        |        |        |     |
| 8              | Actinopterygii | Cypriniformes | Cyprinidae    | <i>Acheilognathus meridianus</i>                                 |       |     |       |         |       |        |        |        |        |        |        |       |     |        |        |       |        |        |        |        |        |        |        |        |     |
| 9              | Actinopterygii | Cypriniformes | Cyprinidae    | <i>Acrossocheilus fasciatus</i>                                  |       |     |       | 117     |       | 263    |        |        |        |        |        |       | 301 | 434    | 588    | 215   | 176    | 131    | 2,656  | 224    | 666    | 561    | 82     | 168    | 120 |
| 10             | Actinopterygii | Cypriniformes | Cyprinidae    | <i>Acrossocheilus kreyenbergii</i>                               | 1,583 | 61  | 59    | 72      | 88    | 151    | 22     | 102    | 33     | 75     | 192    | 48    | 842 | 15,495 | 5,666  | 8,242 | 11,056 | 13,018 | 91,267 | 41,678 | 62,613 | 25,806 | 30,193 | 32,462 | 253 |
| 11             | Actinopterygii | Cypriniformes | Cyprinidae    | <i>Acrossocheilus parallens</i>                                  |       | 42  | 38    | 163     |       | 341    |        |        |        |        |        |       | 520 | 712    | 11,581 | 243   | 247    | 165    | 1,567  | 309    | 791    | 810    | 102    | 711    | 189 |
| 12             | Actinopterygii | Cypriniformes | Cyprinidae    | <i>Ancherythroculter kurematsui</i>                              |       |     |       | 81      |       | 117    | 118    |        | 24     | 134    | 83     | 19    | 93  | 43     | 66     | 101   | 81     | 103    | 273    | 100    | 44     | 31     | 34     |        |     |
| 13             | Actinopterygii | Cypriniformes | Cyprinidae    | <i>Ancherythroculter lini</i>                                    |       |     |       | 13      |       | 24     | 50     |        | 10     | 53     | 21     |       | 19  | 13     | 28     | 19    | 25     | 30     | 57     | 30     | 10     |        |        |        |     |
| 14             | Actinopterygii | Cypriniformes | Cyprinidae    | <i>Balantiocheilus melanopterus</i>                              |       |     |       |         |       |        |        |        |        |        |        |       |     |        |        |       |        |        | 35     |        |        |        |        |        |     |
| 15             | Actinopterygii | Cypriniformes | Cyprinidae    | <i>Barbodes banksi</i>                                           |       | 37  | 23    | 104     |       | 266    |        |        |        |        |        |       | 262 | 483    | 634    | 172   | 129    | 98     | 916    | 178    | 432    | 413    | 64     | 125    | 89  |
| 16             | Actinopterygii | Cypriniformes | Cyprinidae    | <i>Barbodes binotatus</i>                                        |       |     |       |         |       |        |        |        |        |        |        |       |     |        |        |       |        |        | 61     |        |        |        |        |        |     |
| 17             | Actinopterygii | Cypriniformes | Cyprinidae    | <i>Barbus ciscaucasicus</i>                                      |       |     |       | 40      |       | 83     |        |        |        |        |        |       | 100 | 151    | 261    | 71    | 59     | 35     | 548    | 74     | 173    | 156    | 15     | 51     | 41  |
| 18             | Actinopterygii | Cypriniformes | Cyprinidae    | <i>Carassius auratus</i>                                         |       |     |       |         |       |        |        |        |        |        |        |       |     | 10     | 186    | 13    | 13     | 12     | 85     | 27     | 65     | 17     | 31     | 38     |     |
| 19             | Actinopterygii | Cypriniformes | Cyprinidae    | <i>Carassius carassius</i>                                       |       |     |       |         |       |        |        |        |        |        |        |       |     |        |        |       |        | 13     | 10     | 57     | 68     | 45     | 25     | 20     | 19  |
| 20             | Actinopterygii | Cypriniformes | Cyprinidae    | <i>Chanodichthys erythropterus</i>                               | 28    |     | 18    | 53      | 13    | 118    | 169    |        | 48     | 219    | 84     | 33    | 93  | 51     | 77     | 84    | 2,471  | 92     | 266    | 102    | 46     |        | 31     | 26     |     |
| 21             | Actinopterygii | Cypriniformes | Cyprinidae    | <i>Cylocheilichthys janthochir</i>                               |       |     |       |         |       |        |        |        |        |        |        |       |     |        |        |       |        |        |        |        |        |        |        |        |     |
| 22             | Actinopterygii | Cypriniformes | Cyprinidae    | <i>Cyprinus carpio 'mirror' x Cyprinus carpio 'singuonensis'</i> |       |     |       |         |       |        |        |        |        |        |        |       |     |        |        |       |        |        |        |        |        |        |        |        |     |
| 23             | Actinopterygii | Cypriniformes | Cyprinidae    | <i>Cyprinus megalophthalmus</i>                                  |       |     |       |         |       |        |        |        |        |        |        |       |     |        |        |       |        |        |        |        |        |        |        |        |     |
| 24             | Actinopterygii | Cypriniformes | Cyprinidae    | <i>Dawkinsia tambraparniei</i>                                   |       |     |       |         |       |        |        |        |        |        |        |       |     |        |        |       |        |        |        |        |        |        |        |        |     |
| 25             | Actinopterygii | Cypriniformes | Cyprinidae    | <i>Discherodontus ashmeadi</i>                                   |       |     |       |         |       |        |        |        |        |        |        |       |     |        |        |       |        |        |        |        |        |        |        |        |     |
| 26             | Actinopterygii | Cypriniformes | Cyprinidae    | <i>Elopicthys bambusa</i>                                        | 27    | 29  | 22    | 27      | 21    | 18     | 46,320 | 816    | 22     | 23     | 45     | 23    |     |        |        |       |        |        |        |        |        |        |        |        |     |
| 27             | Actinopterygii | Cypriniformes | Cyprinidae    | <i>Eremichthys acros</i>                                         |       |     |       |         |       |        |        |        |        |        |        |       |     |        |        |       |        |        |        |        |        |        |        |        |     |
| 28             | Actinopterygii | Cypriniformes | Cyprinidae    | <i>Gnathopogon strigatus</i>                                     |       |     |       |         |       |        |        |        |        |        |        |       |     |        |        |       |        |        |        |        |        |        |        |        |     |
| 29             | Actinopterygii | Cypriniformes | Cyprinidae    | <i>Gobiobotia macrocephala</i>                                   | 60    | 51  | 42    |         |       |        | 103    | 339    | 98     |        |        |       |     |        |        |       |        |        |        |        |        |        |        |        |     |
| 30             | Actinopterygii | Cypriniformes | Cyprinidae    | <i>Hemibarbus labeo</i>                                          |       |     |       |         |       |        |        |        |        |        |        |       |     |        |        |       |        |        |        |        |        |        |        |        |     |
| 31             | Actinopterygii | Cypriniformes | Cyprinidae    | <i>Hemibarbus umbrifer</i>                                       |       |     |       |         |       |        |        |        |        |        |        |       |     |        |        |       |        |        |        |        |        |        |        |        |     |
| 32             | Actinopterygii | Cypriniformes | Cyprinidae    | <i>Hemiculter leucisculus</i>                                    | 23    | 123 | 75    | 299     | 420   | 389    | 181    | 150    | 46     | 174    | 216    | 19    | 160 | 43     | 69     | 97    | 89     | 92     | 258    | 168    | 40     |        | 19     | 25     |     |
| 33             | Actinopterygii | Cypriniformes | Cyprinidae    | <i>Hemiculterella sauvagei</i>                                   |       |     |       |         |       |        |        |        |        |        |        |       |     |        |        |       |        |        |        |        |        |        |        |        |     |
| 34             | Actinopterygii | Cypriniformes | Cyprinidae    | <i>Hypophthalmichthys molitrix</i>                               | 21    | 10  | 12    | 226     | 272   | 123    |        |        | 73     | 89     | 446    | 949   | 214 | 156    | 268    | 239   | 39     | 25     | 43     |        |        |        | 51     | 14     |     |
| 35             | Actinopterygii | Cypriniformes | Cyprinidae    | <i>Margariscus margarita</i>                                     |       |     |       |         |       |        |        |        |        |        |        |       |     |        |        |       |        |        |        |        |        |        |        |        |     |
| 36             | Actinopterygii | Cypriniformes | Cyprinidae    | <i>Onychostoma barbatulum</i>                                    |       |     |       | 57      |       | 97     |        |        |        |        |        |       |     |        |        |       |        |        |        |        |        |        |        |        |     |
| 37             | Actinopterygii | Cypriniformes | Cyprinidae    | <i>Osteobrama cotio</i>                                          |       |     |       | 30      |       | 80     |        |        |        |        |        |       |     |        |        |       |        |        |        |        |        |        |        |        |     |
| 38             | Actinopterygii | Cypriniformes | Cyprinidae    | <i>Platygobio gracilis</i>                                       |       |     |       |         |       |        |        |        |        |        |        |       |     |        |        |       |        |        |        |        |        |        |        |        |     |
| 39             | Actinopterygii | Cypriniformes | Cyprinidae    | <i>Procypris rabaudi</i>                                         |       |     |       |         |       |        |        |        |        |        |        |       |     |        |        |       |        |        |        |        |        |        |        |        |     |
| 40             | Actinopterygii | Cypriniformes | Cyprinidae    | <i>Pseudaspis leptocephalus</i>                                  |       |     |       |         |       |        |        |        |        |        |        |       |     |        |        |       |        |        |        |        |        |        |        |        |     |
| 41             | Actinopterygii | Cypriniformes | Cyprinidae    | <i>Pseudohemiculter dispar</i>                                   |       |     |       | 25      |       | 42     | 41     |        | 12     | 71     | 22     |       |     |        |        |       |        |        |        |        |        |        |        |        |     |
| 42             | Actinopterygii | Cypriniformes | Cyprinidae    | <i>Pseudolaubuca engraulis</i>                                   | 5,399 | 327 | 2,206 | 15,396  | 2,218 | 30,985 | 39,574 | 527    | 10,417 | 43,421 | 21,019 | 6,065 |     |        |        |       |        |        |        |        |        |        |        |        |     |
| 43             | Actinopterygii | Cypriniformes | Cyprinidae    | <i>Ptychocheilus umpqua</i>                                      |       |     |       |         |       |        |        |        |        |        |        |       |     |        |        |       |        |        |        |        |        |        |        |        |     |
| 44             | Actinopterygii | Cypriniformes | Cyprinidae    | <i>Puntopites waandersi</i>                                      |       |     |       | 10      |       | 10     |        |        |        |        |        |       |     |        |        |       |        |        |        |        |        |        |        |        |     |
| 45             | Actinopterygii | Cypriniformes | Cyprinidae    | <i>Rutilus rutilus</i>                                           |       |     |       |         |       |        |        |        |        |        |        |       |     |        |        |       |        |        |        |        |        |        |        |        |     |
| 46             | Actinopterygii | Cypriniformes | Cyprinidae    | <i>Sarcocheilichthys lacustris</i>                               |       |     |       |         |       |        |        |        |        |        |        |       |     |        |        |       |        |        |        |        |        |        |        |        |     |
| 47             | Actinopterygii | Cypriniformes | Cyprinidae    | <i>Sarcocheilichthys sinensis</i>                                |       |     |       |         |       |        |        |        |        |        |        |       |     |        |        |       |        |        |        |        |        |        |        |        |     |
| 48             | Actinopterygii | Cypriniformes | Cyprinidae    | <i>Saurogobio immaculatus</i>                                    |       |     |       |         |       |        |        |        |        |        |        |       |     |        |        |       |        |        |        |        |        |        |        |        |     |
| 49             | Actinopterygii | Cypriniformes | Cyprinidae    | <i>Schizothorax plagiosomus</i>                                  |       |     |       | 28      |       | 56     |        |        |        |        |        |       |     |        |        |       |        |        |        |        |        |        |        |        |     |
| 50             | Actinopterygii | Cypriniformes | Cyprinidae    | <i>Semotilus atromaculatus</i>                                   | 30    | 12  | 29    |         |       |        | 31     | 123    | 15     | 10     |        | 154   | 150 | 496    | 343    |       |        |        |        |        |        |        |        |        |     |
| 51             | Actinopterygii | Cypriniformes | Cyprinidae    | <i>Sinibrama macrops</i>                                         |       |     |       | 65      | 23    | 86     | 66     |        | 16     | 148    | 69     | 12    | 90  | 54     | 82     | 66    | 35     | 41     | 167    | 73     | 14     |        | 11     | 14     |     |
| 52             | Actinopterygii | Cypriniformes | Cyprinidae    | <i>Spinibarbus denticulatus</i>                                  |       |     |       | 26      |       | 74     |        |        |        |        |        |       |     |        |        |       |        |        |        |        |        |        |        |        |     |
| 53             | Actinopterygii | Cypriniformes | Cyprinidae    | <i>Squalidus argentatus</i>                                      | 101   | 96  | 115   | 125,604 | 143   | 128    | 146    | 146    | 91     | 103    | 116    | 99    | 15  | 137    | 12,843 | 3,600 | 65     | 10     |        |        |        |        |        |        |     |
| 54             | Actinopterygii | Cypriniformes | Cyprinidae    | <i>Squalidus multimaculatus</i>                                  |       |     |       |         |       |        |        |        |        |        |        |       |     |        |        |       |        |        |        |        |        |        |        |        |     |
| 55             | Actinopterygii | Cypriniformes | Cyprinidae    | <i>Squalidus volterstorffi</i>                                   |       |     |       |         |       |        |        |        |        |        |        |       |     |        |        |       |        |        |        |        |        |        |        |        |     |
| 56             | Actinopterygii | Cypriniformes | Cyprinidae    | <i>Squalius lepidus</i>                                          |       |     |       |         |       |        |        |        |        |        |        |       |     |        |        |       |        |        |        |        |        |        |        |        |     |
| 57             | Actinopterygii | Cypriniformes | Cyprinidae    | <i>Tinca tinca</i>                                               |       |     |       |         |       |        |        |        |        |        |        |       |     |        |        |       |        |        |        |        |        |        |        |        |     |
| 58             | Actinopterygii | Cypriniformes | Cyprinidae    | <i>Toxabramis houdemeri</i>                                      |       |     |       |         |       |        |        |        |        |        |        |       |     |        |        |       |        |        |        |        |        |        |        |        |     |







**Table S7:** Fish species identified across all samples within a region and season.

| <b>Samples</b>                            | <b>Number of species</b> | <b>Species</b>                                                                                                                                                                                                                                                                                                                                                                                                                                                                                                                                        |
|-------------------------------------------|--------------------------|-------------------------------------------------------------------------------------------------------------------------------------------------------------------------------------------------------------------------------------------------------------------------------------------------------------------------------------------------------------------------------------------------------------------------------------------------------------------------------------------------------------------------------------------------------|
| 5 spring samples from Tian-e-Zhou Reserve | 11                       | <i>Acanthorhodeus chankaensis</i> , <i>Acrossocheilus kreyenbergii</i> , <i>Chanodichthys erythropterus</i> , <i>Hemiculter leucisculus</i> , <i>Hypophthalmichthys molitrix</i> , <i>Oncorhynchus formosanus</i> , <i>Prosopium cylindraceum</i> , <i>Pseudolaubuca engraulis</i> , <i>Rhinogobius giurinus</i> , <i>Squalidus argentatus</i> , <i>Tachysurus nitidus</i>                                                                                                                                                                            |
| 5 summer samples from Tian-e-Zhou Reserve | 10                       | <i>Acrossocheilus kreyenbergii</i> , <i>Coilia lindmani</i> , <i>Coilia mystus</i> , <i>Hemiculter leucisculus</i> , <i>Hypophthalmichthys molitrix</i> , <i>Pseudolaubuca engraulis</i> , <i>Rhinogobius giurinus</i> , <i>Sinibrama macrops</i> , <i>Squalidus argentatus</i> , <i>Tachysurus nitidus</i>                                                                                                                                                                                                                                           |
| 10 spring samples from Poyang Lake        | 17                       | <i>Acanthorhodeus chankaensis</i> , <i>Acrossocheilus fasciatus</i> , <i>Acrossocheilus kreyenbergii</i> , <i>Acrossocheilus parallens</i> , <i>Barbodes banksi</i> , <i>Barbus ciscaucasicus</i> , <i>Coilia lindmani</i> , <i>Oncorhynchus formosanus</i> , <i>Onychostoma barbatulum</i> , <i>Osteobrama cotio</i> , <i>Prosopium cylindraceum</i> , <i>Pseudobagrus vachellii</i> , <i>Pseudolaubuca engraulis</i> , <i>Rhinogobius giurinus</i> , <i>Schizothorax plagiostomus</i> , <i>Spinibarbus denticulatus</i> , <i>Tachysurus nitidus</i> |
| 10 summer samples from Poyang Lake        | 6                        | <i>Acanthorhodeus chankaensis</i> , <i>Acrossocheilus kreyenbergii</i> , <i>Coilia lindmani</i> , <i>Pseudolaubuca engraulis</i> , <i>Rhinogobius giurinus</i> , <i>Tachysurus nitidus</i>                                                                                                                                                                                                                                                                                                                                                            |

## Supplementary figures

**Figure S1:** Rarefaction curves of fish species in the spring (**a** and **c**) and summer (**b** and **d**) for Tian-e-Zhou Baiji National Natural Reserve (T) and Poyang Lake (P).

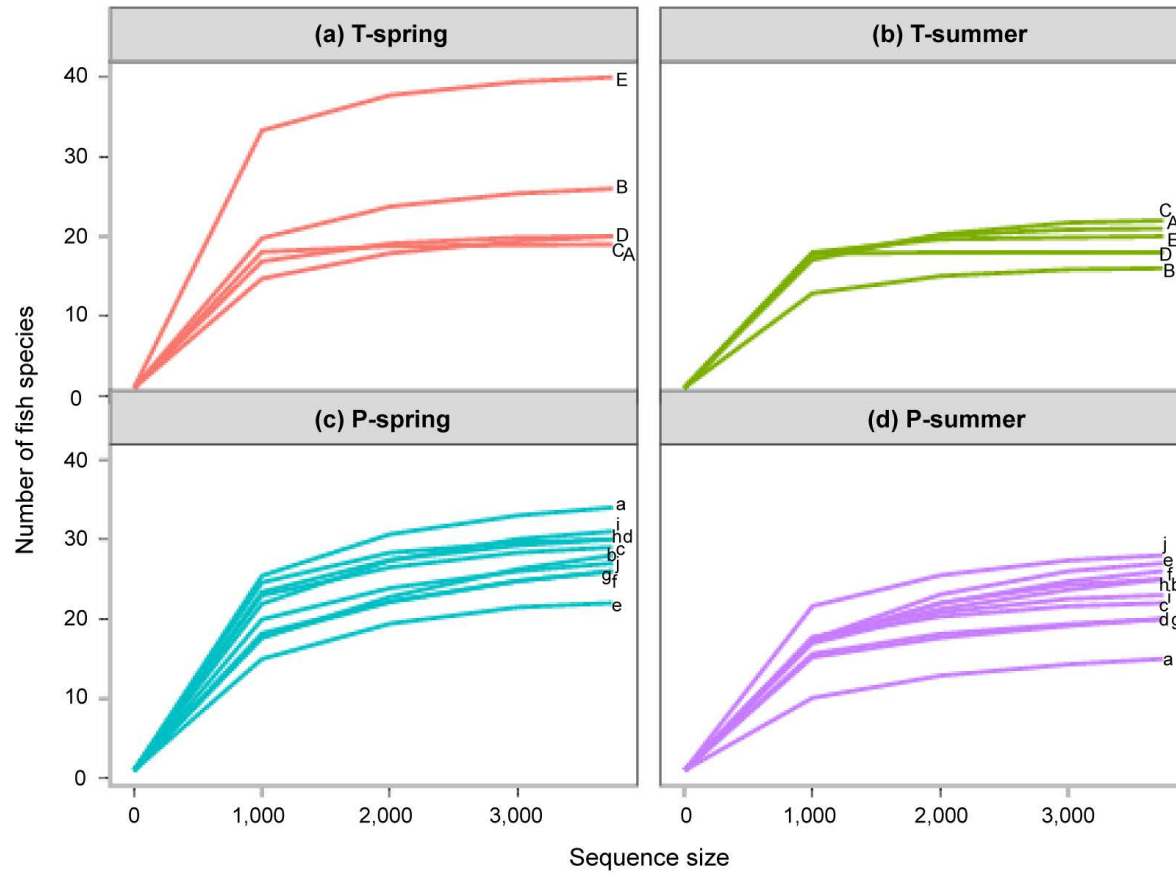

**Figure S2:** Distributions of fish species categorized into the type of depth they inhabit across sampling sites in the spring (a and c) and summer (b and d) for Tian-e-Zhou Baiji National Natural Reserve (T) and Poyang Lake (P).

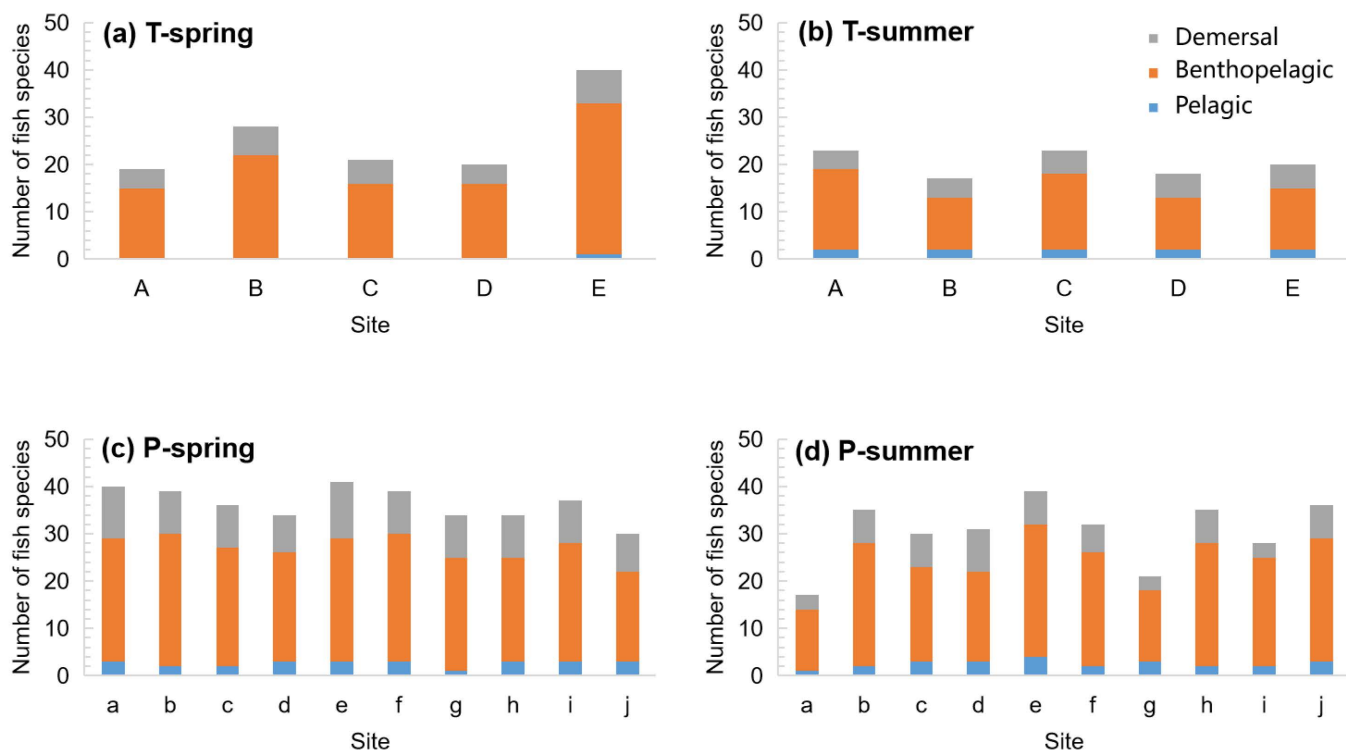

Figure S3: Distribution and relative proportion of fish species across regions and seasons.

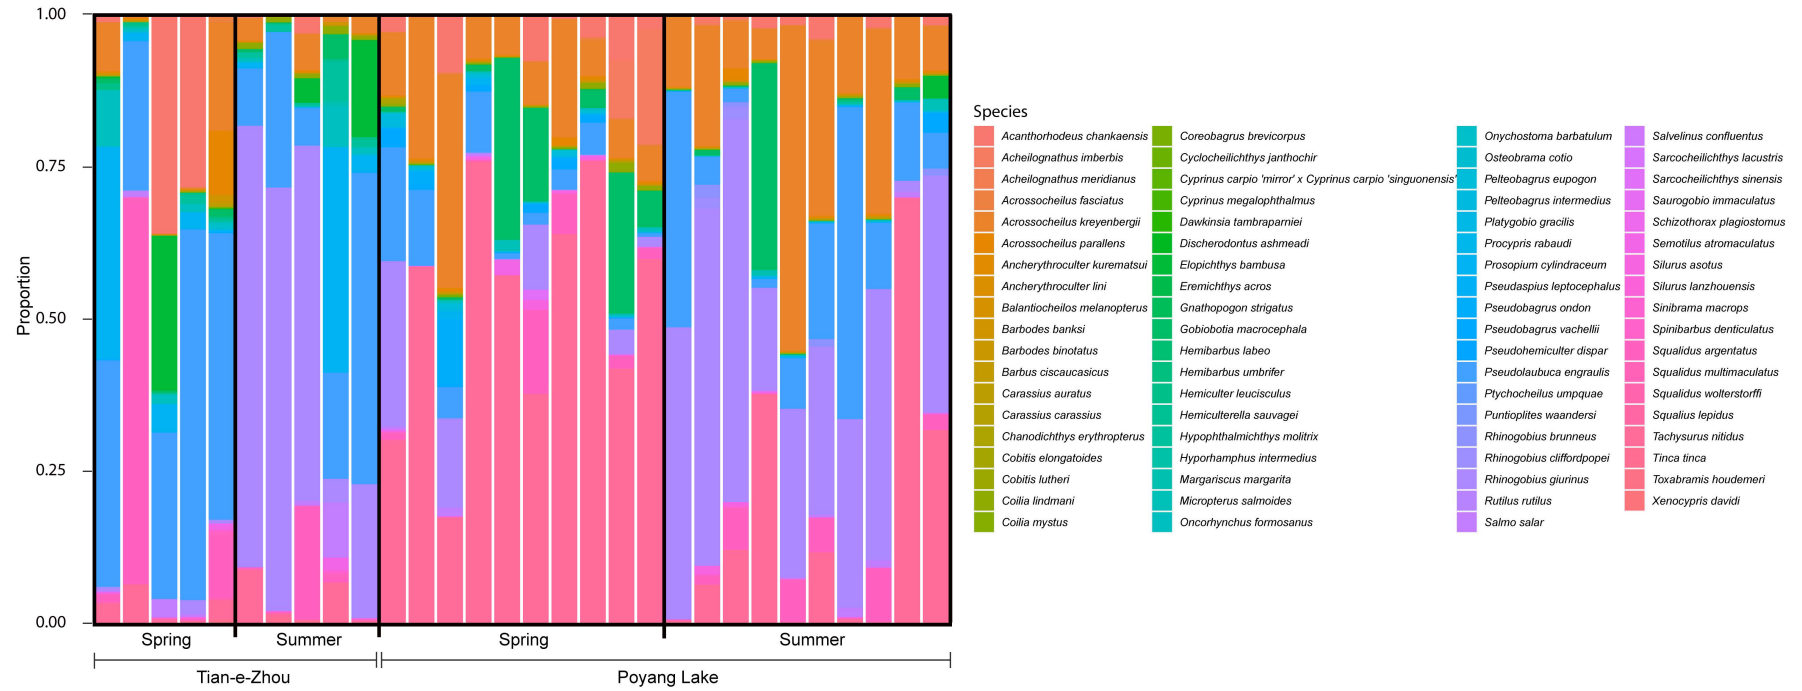

**Figure S4:** Distribution and relative proportion of fish families across regions and seasons.

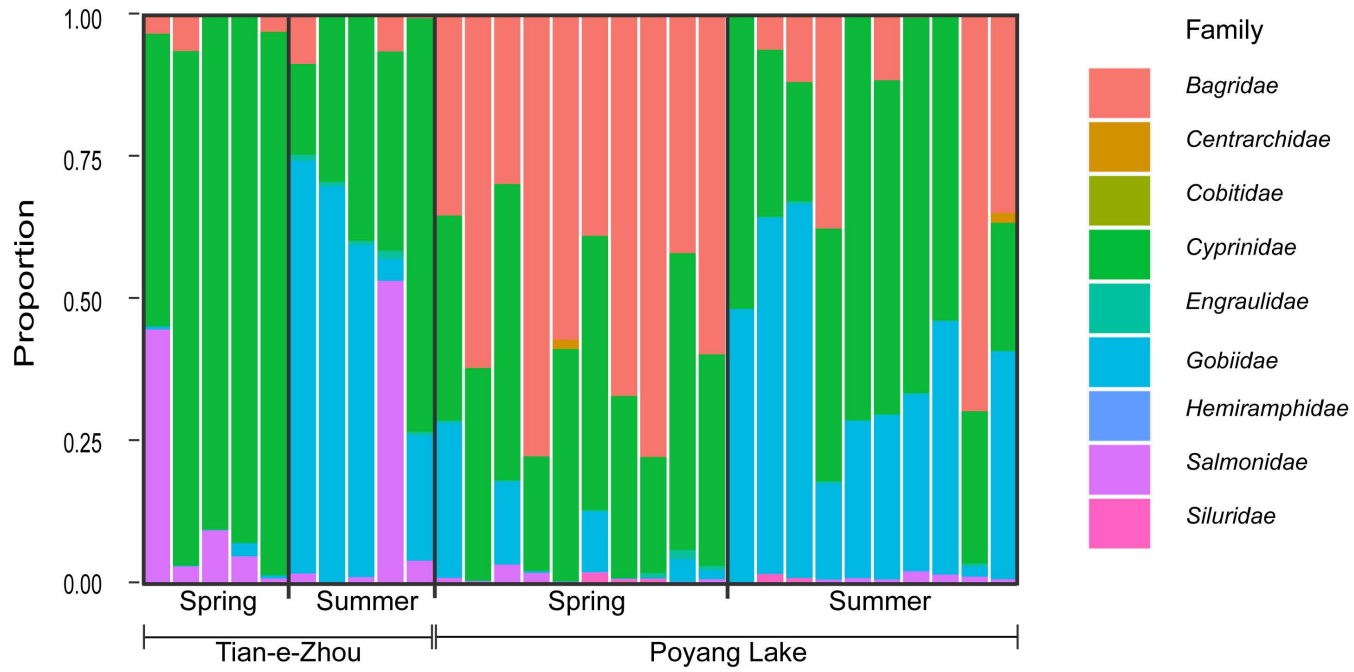

## Supplementary literature cited

1. Yang, J. *et al.* A preliminary study on diet of the Yangtze finless porpoise using next-generation sequencing techniques. *Mar. Mammal Sci.* **35**, 1579-1586 (2019).
2. Hou, Y. Study on biology of finless porpoise from Yangtze river in captivity. *J. Aquacult.* **3**, 13-17 (1993). (In Chinese)
3. Chen, R., Wei, Y., Wu, L., Zheng, B. & Li, J. PAE coding system-based ethogram of Yangtze finless porpoise (*Neophocaena phocaenoides asiaeorientalis*) in a semi-natural environment. *Acta Theriol. Sinica* **35**, 40-47 (2015). (In Chinese)
4. Zhang, X. Reasons analysis and protection strategies of river dolphin risk in Tongling River Dolphin National Nature Reserve. *J. Tongling Univ.* **(1)**, 102-105 (2017). (In Chinese)
5. Yu, D., Jiang, W. & Han, D. Observation on the adaptation of Yangtze finless porpoise (*Neophocaena phocaenoides asiaeorientalis*) to artificial feeding. *Acta Theriol. Sinica* **27**, 365-369 (2007). (In Chinese)
6. Zhu, Y., Liao, W., Feng, S. & Tan, H. Analysis of the Yangtze finless porpoise habitat characteristics. *Proceedings of the 4th National Conference on Hydraulics and Water Conservancy Informatics*, 140-146 (2009). (In Chinese)
7. Yu, D., Jiang, W. & Mi, L. Preliminary observations on feeding behavior of finless porpoises in a semi-nature reserve of Yangtze River. *Acta Theriol. Sinica* **23**, 198-202 (2003). (In Chinese)
